# Supplementary material for: Glomerular expression pattern of long non-coding RNAs in the type 2 diabetes mellitus BTBR mouse model
Source: PubMed Central journal article supplement (PMC6611801; doi:10.1038/s41598-019-46180-1), 2019-07-05
Supplement: 41598_2019_46180_MOESM1_ESM.pdf [file 41598_2019_46180_MOESM1_ESM.pdf]

## Glomerular expression pattern of long non-coding RNAs in the type 2 diabetes mellitus BTBR mouse model

Simone Reichelt-Wurm\*<sup>1</sup>, Tobias Wirtz<sup>1</sup>, Dominik Chittka<sup>1</sup>, Maja Lindenmeyer<sup>2,3</sup>, Robert M. Reichelt<sup>4</sup>, Sebastian Beck<sup>1</sup>, Panagiotis Politis<sup>5</sup>, Aristidis Charonis<sup>6</sup>, Markus Kretz<sup>7</sup>, Tobias B. Huber<sup>3</sup>, Shuya Liu<sup>3</sup>, Bernhard Banas<sup>1</sup>, Miriam C. Banas<sup>1</sup>

- 1) Department of Nephrology, University Hospital of Regensburg, Germany
- 2) Department of Internal Medicine IV - Nephrology, University Hospital of Munich, Germany
- 3) III. Department of Medicine, University Medical Center Hamburg-Eppendorf, Hamburg, Germany
- 4) Department of Biochemistry, Genetics and Microbiology, Institute of Microbiology, University of Regensburg, Regensburg, Germany
- 5) Center for Basic Research, Biomedical Research Foundation of the Academy of Athens, Athens, Greece
- 6) Center for Clinical, Experimental Surgery and Translational Research, Biomedical Research Foundation of the Academy of Athens, Athens, Greece
- 7) Institute of Biochemistry, Genetics and Microbiology, University of Regensburg, Regensburg, Germany

### Supplementary information

| Name                   | Title                                                                                         | Page |
|------------------------|-----------------------------------------------------------------------------------------------|------|
| Supplementary Table 1  | LncRNAs which were differentially expressed in two or three age groups                        | 2-3  |
| Supplementary Table 2  | Differentially expressed genes and their corresponding sense transcripts                      | 4-5  |
| Supplementary Table 3  | Differentially expressed genes and their corresponding antisense transcripts                  | 6-7  |
| Supplementary Table 4  | Differentially expressed genes and their corresponding neighboring transcripts                | 8    |
| Supplementary Table 5  | Primer sequences of analyzed coding and non-coding genes                                      | 9    |
| Supplementary Figure 1 | Characterization of BTBR WT and BTBR ob/ob mice in the course of time                         | 10   |
| Supplementary Figure 2 | A representative photograph from sieved glomeruli from BTBR mice showing the degree of purity | 11   |
| Supplementary Figure 3 | Murine karyotype                                                                              | 12   |
| Supplementary Figure 4 | Pde4d gene locus with all intragenic encoded lncRNA genes                                     | 13   |

## SUPPLEMENTARY DATA

**Supplementary Table 1: LncRNAs which were differentially expressed in two or three age groups**

| Age             | Transcript                                            | Regulation | Description                                              | Transcript                      | Regulation | Description                                 |
|-----------------|-------------------------------------------------------|------------|----------------------------------------------------------|---------------------------------|------------|---------------------------------------------|
| 8 and 16 weeks  | NONMMUT026469                                         | ↓          | LincRNA (Stfa3, Casr)                                    | NONMMUT042033, KnowTID_00004635 | ↑          | LincRNA (w/o)                               |
|                 | NONMMUT065898                                         | ↓          | Antisense (Lpl)                                          | LOC100861638                    | ↓          | Antisense (Lpl)                             |
| 8 and 24 weeks  | NONMMUT008002, KnowTID_00001095                       | ↓          | LincRNA (Slc16a7)                                        | NONMMUT042033, KnowTID_00004635 | ↑          | LincRNA (w/o)                               |
|                 | NONMMUT026469                                         | ↓          | LincRNA (Stfa3, Casr)                                    | NONMMUT067315, KnowTID_00007381 | ↑          | LincRNA (w/o)                               |
|                 | NONMMUT065898                                         | ↓          | Antisense (Lpl)                                          |                                 |            |                                             |
| 16 and 24 weeks | NONMMUT026469                                         | ↓          | LincRNA (Stfa3, Casr)                                    | NONMMUT017881                   | ↑          | Antisense (Zfp808)                          |
|                 | NONMMUT065898                                         | ↓          | Antisense (Lpl)                                          | NONMMUT048937                   | ↑          | LincRNA (Eri3, Dmap1)                       |
|                 | NONMMUT042033, KnowTID_00004635                       | ↑          | LincRNA (w/o)                                            | NONMMUT058096, KnowTID_00006395 | ↑          | LincRNA (w/o)                               |
|                 | NONMMUT070579, ENSMUST0000014541, uc009rcz.1, Gm16010 | ↓          | Antisense (Spsb4)                                        | NONMMUT023016                   | ↑          | Sense (Fam173b)<br>LincRNA (Cct5, Cmb1)     |
|                 | NONMMUT001552                                         | ↑          | Sense (Prkag3)<br>LincRNA (Ttll4, Cyp27a1, Wnt6, Wnt10a) | uc007h xv.1<br>BC019819         | ↑          | Sense (Camk2b)<br>LincRNA (Ykt6)            |
|                 | NONMMUT004848, KnowTID_00000887                       | ↓          | LincRNA (Nhs11, Hebp2, Arfgef3)                          | NONMMUT024412, KnowTID_00002815 | ↑          | LincRNA (A4galt, Arfgap3)                   |
|                 | NONMMUT056934, ENSMUST0000015575, Halr1, linc1547     | ↓          | LincRNA (Hoxa1, Hoxa2)                                   | NONMMUT066116, KnowTID_00007069 | ↑          | LincRNA (Rab8a, Hsh2d, Cib3, Fam32a, Ap1m1) |
|                 | NONMMUT031786                                         | ↑          | LincRNA (Pik3c3)                                         | NONMMUT062715                   | ↓          | Antisense (Dlg2)                            |

|                           |                                                                       |   |                                                                                                                                                                                        |                                                  |   |                                                                        |
|---------------------------|-----------------------------------------------------------------------|---|----------------------------------------------------------------------------------------------------------------------------------------------------------------------------------------|--------------------------------------------------|---|------------------------------------------------------------------------|
|                           | NONMMUT016243,<br>KnowTID_00001965                                    | ↓ | LincRNA (Akr1c6)                                                                                                                                                                       | NONMMUT008425,<br>KnowTID_00001219               | ↑ | LincRNA<br>(Xbp1, Ccdc117, Ankrd36)                                    |
|                           | NONMMUT013364,<br>NovelTID_00001374                                   | ↑ | LincRNA (Rhob, Slc7a15)                                                                                                                                                                | uc029sca.1,<br>A130040M12Rik                     | ↑ | LincRNA (w/o)                                                          |
|                           | NONMMUT070568,<br>KnowTID_00007786                                    | ↑ | LincRNA (Pxy1p1)                                                                                                                                                                       | NONMMUT033453,<br>KnowTID_00004163               |   | LincRNA (Ndufv1, Gstp1, Gstp2,<br>Cabp2, Cdk2ap2, Aip)                 |
|                           | NONMMUT060091,<br>KnowTID_00006493                                    | ↑ | LincRNA (w/o)                                                                                                                                                                          | NONMMUT005529,<br>KnowTID_00000711               | ↑ | LincRNA (w/o)                                                          |
|                           | NONMMUT016573,<br>KnowTID_00001996                                    | ↑ | LincRNA (Hist1h2bl, Hist1h2ai,<br>Hist1h3h, Hist1h2bm, Hist1h4j,<br>Hist1h4k, Hist1h2ak, Hist1h2bn,<br>Hist1h1b, Hist1h3i, Hist1h2an,<br>Hist1h2bp, Hist1h2br, Hist1h2ao,<br>Hist1h4m) | NONMMUT056587                                    | ↑ | LincRNA (Trbv16, Trbv17,<br>Trbv19, Trbv20, Trbv21, Trbv23,<br>Trbv26) |
|                           | NONMMUT017501,<br>NovelTID_00001743                                   | ↑ | LincRNA (Cks2 Secisbp2)                                                                                                                                                                | NONMMUT046091,<br>KnowTID_00005242               | ↑ | LincRNA (w/o)                                                          |
|                           | NONMMUT055891,<br>ENSMUSG00000106874,<br>KnowTID_00006260,<br>Gm20186 | ↑ | LincRNA (Lsm8 Ankrd7)                                                                                                                                                                  | NONMMUT048938,<br>ENSMUST00000156081,<br>Gm12840 | ↑ | LincRNA (Eri3, Dmap1)                                                  |
|                           | NONMMUT011314,<br>KnowTID_00001300,<br>A130040M12Rik                  | ↑ | LincRNA (Dhx40)                                                                                                                                                                        | NONMMUT020278,<br>KnowTID_00002271               | ↑ | LincRNA (Dph3, Oxnad1,<br>MsMb, Ncoa4)                                 |
| 8, 16,<br>and 24<br>weeks | NONMMUT026469                                                         | ↓ | LincRNA (Stfa3, Casr)                                                                                                                                                                  | NONMMUT042033,<br>KnowTID_00004635               | ↑ | LincRNA (w/o)                                                          |
|                           | NONMMUT065898                                                         | ↓ | Antisense (Lpl)                                                                                                                                                                        |                                                  |   |                                                                        |

Supplementary Table 1: Column 1 displays the age of mice of BTBR mice; column 2 and 5 show the name(s) of a differentially expressed lincRNA; column 3 and 4 indicate if the lincRNAs is upregulated (↑) or downregulated (↓), column 4 and 6 show the orientation of the lincRNA (antisense or sense) or if it is a intergenic lincRNA (linc). The coding gene, which is associated with the lincRNA, is enclosed in brackets; lincRNAs without an adjacent coding gene 50 kb up- or downstream are indicated with (w/o)

**Supplementary Table 2: Differentially expressed genes and their corresponding sense transcripts**

| Age      | Gene    | Fold change          | FDR p value          | Sense transcript (more than one annotation possible) | Fold change          | FDR p value          |
|----------|---------|----------------------|----------------------|------------------------------------------------------|----------------------|----------------------|
| 16 weeks | Prkag3  | 2.01                 | 7.3*10 <sup>-3</sup> | NONMMUT001552                                        | 4.23                 | 1.0*10 <sup>-2</sup> |
| 24 weeks | Aspa    | 2.52                 | 2.6*10 <sup>-2</sup> | NONMMUT010642                                        | 5.40                 | 1.4*10 <sup>-3</sup> |
|          | Atxn711 | 2.03                 | 8.0*10 <sup>-4</sup> | NONMMUT013897                                        | 2.05                 | 4.3*10 <sup>-2</sup> |
|          | Ccdc141 | 4.40                 | 3.9*10 <sup>-2</sup> | NONMMUT038073                                        | 5.13                 | 2.0*10 <sup>-2</sup> |
|          | Cpeb2   | 2.05                 | 6,9*10 <sup>-5</sup> | NONMMUT052099                                        | 5.38                 | 4.0*10 <sup>-4</sup> |
|          | Cpeb3   | 2.18                 | 1.0*10 <sup>-3</sup> | NONMMUT034599                                        | 3.22                 | 1.0*10 <sup>-3</sup> |
|          | Cpeb4   | 2.07                 | 2.0*10 <sup>-3</sup> | NONMMUT009161                                        | 4.28                 | 4.6*10 <sup>-3</sup> |
|          | Cspp1   | 2.06                 | 1.8*10 <sup>-2</sup> | NONMMUT000139                                        | 2.35                 | 3.3*10 <sup>-2</sup> |
|          | Fam214a | 2.49                 | 3.0*10 <sup>-4</sup> | NONMMUT070040                                        | 2.51                 | 1.8*10 <sup>-3</sup> |
|          | Fam214a | 2.49                 | 3.0*10 <sup>-4</sup> | NONMMUT07004                                         | 6.40                 | 1.0*10 <sup>-4</sup> |
|          | Fnip2   | 2.30                 | 2.6*10 <sup>-2</sup> | NONMMUT043553<br>ENSMUST00000161319<br>Gm3513        | 2.86                 | 1.4*10 <sup>-3</sup> |
|          | Fnip2   | 2.30                 | 2.6*10 <sup>-2</sup> | NONMMUT043550                                        | 3.39                 | 2.5*10 <sup>-3</sup> |
|          | Fnip2   | 2.30                 | 2.6*10 <sup>-2</sup> | NONMMUT043551                                        | 7.95                 | 4.0*10 <sup>-2</sup> |
|          | Frmd4b  | 3.62                 | 3.0*10 <sup>-5</sup> | NONMMUT058138                                        | 2.48                 | 3.0*10 <sup>-4</sup> |
|          | Frmd4b  | 3.62                 | 3.0*10 <sup>-5</sup> | NONMMUT058137                                        | 3.97                 | 4.3*10 <sup>-3</sup> |
|          | Frmd4b  | 3.62                 | 3.0*10 <sup>-5</sup> | NONMMUT058134                                        | 7.56                 | 2.7*10 <sup>-2</sup> |
|          | Gls     | 2.07                 | 5.5*10 <sup>-3</sup> | NONMMUT000877                                        | 2.00                 | 1.5*10 <sup>-3</sup> |
|          | Gls     | 2.07                 | 5.5*10 <sup>-3</sup> | NONMMUT000875                                        | 2.36                 | 6.7*10 <sup>-3</sup> |
|          | Gls     | 2.07                 | 5.5*10 <sup>-3</sup> | NONMMUT000869                                        | 4.70                 | 2.8*10 <sup>-2</sup> |
|          | Gramd1b | 5.04                 | 3,8*10 <sup>-6</sup> | NONMMUT068680                                        | 6.84                 | 2.4*10 <sup>-3</sup> |
|          | Gramd1b | 5.04                 | 3,8*10 <sup>-6</sup> | NONMMUT068679                                        | 13.92                | 1.1*10 <sup>-2</sup> |
|          | Gramd1b | 5.04                 | 3,8*10 <sup>-6</sup> | NONMMUT068681                                        | 16.58                | 2.3*10 <sup>-3</sup> |
|          | Gria3   | 4.14                 | 2.0*10 <sup>-4</sup> | NONMMUT072210                                        | 11.00                | 7.0*10 <sup>-5</sup> |
|          | Hmgcs2  | 34.33                | 6.0*10 <sup>-4</sup> | NONMMUT044365                                        | 5.39                 | 1.0*10 <sup>-4</sup> |
|          | Itrp1   | 2.56                 | 1.0*10 <sup>-4</sup> | NONMMUT058318                                        | 4.35                 | 3.2*10 <sup>-2</sup> |
|          | Itrp1   | 2.56                 | 1.0*10 <sup>-4</sup> | NONMMUT058320                                        | 5.34                 | 1.0*10 <sup>-4</sup> |
|          | Itrp1   | 2.56                 | 1.0*10 <sup>-4</sup> | NONMMUT058319                                        | 6.01                 | 1.3*10 <sup>-3</sup> |
|          | Lrig2   | 2.06                 | 2.3*10 <sup>-3</sup> | NONMMUT044600                                        | 4.72                 | 1.3*10 <sup>-3</sup> |
|          | Lrig2   | 2.06                 | 2.3*10 <sup>-3</sup> | NONMMUT044599                                        | 5.31                 | 1.5*10 <sup>-3</sup> |
| Lrig2    | 2.06    | 2.3*10 <sup>-3</sup> | NONMMUT044601        | 5.54                                                 | 6.0*10 <sup>-4</sup> |                      |
| Metap1d  | 2.00    | 3.7*10 <sup>-3</sup> | NONMMUT037822        | 2.76                                                 | 8.7*10 <sup>-3</sup> |                      |
| Nrg1     | 2.09    | 8.0*10 <sup>-4</sup> | NONMMUT065117        | 3.90                                                 | 1.0*10 <sup>-4</sup> |                      |
| Pde4c    | 3.02    | 5.0*10 <sup>-4</sup> | NONMMUT066016        | 4.49                                                 | 1.6*10 <sup>-3</sup> |                      |
| Prkag3   | 2.44    | 1.0*10 <sup>-4</sup> | NONMMUT001552        | 5.92                                                 | 3.0*10 <sup>-4</sup> |                      |

|          |      |                      |                                                |      |                      |
|----------|------|----------------------|------------------------------------------------|------|----------------------|
| Prpf39   | 2.11 | 1.5*10 <sup>-2</sup> | NONMMUT014398                                  | 2.18 | 0.0160               |
| Pxmp4    | 2.04 | 1.1*10 <sup>-2</sup> | NONMMUT040619                                  | 8.14 | 2.0*10 <sup>-5</sup> |
| Rere     | 2.53 | 8.4*10 <sup>-3</sup> | NONMMUT050705                                  | 3.00 | 1.6*10 <sup>-2</sup> |
| Rere     | 2.53 | 8.4*10 <sup>-3</sup> | NONMMUT050715                                  | 4.31 | 1.3*10 <sup>-2</sup> |
| Sh3rf1   | 2.26 | 8.2*10 <sup>-3</sup> | NONMMUT065770                                  | 2.17 | 1.8*10 <sup>-2</sup> |
| Slco3a1  | 2.10 | 9.0*10 <sup>-4</sup> | NONMMUT062223                                  | 2.00 | 1.1*10 <sup>-2</sup> |
| Slco3a1  | 2.10 | 9.0*10 <sup>-4</sup> | NONMMUT062221                                  | 2.68 | 2.0*10 <sup>-3</sup> |
| Srcin1   | 2.11 | 3.8*10 <sup>-3</sup> | NONMMUT011803<br>ENSMUST00000134289<br>Gm11611 | 2.63 | 2.0*10 <sup>-2</sup> |
| Srek1    | 2.58 | 5.6*10 <sup>-3</sup> | NONMMUT018986                                  | 2.15 | 1.2*10 <sup>-2</sup> |
| Tacc2    | 2.47 | 2.2*10 <sup>-6</sup> | NONMMUT063899                                  | 2.44 | 1.8*10 <sup>-3</sup> |
| Tnrc6a   | 2.38 | 1.1*10 <sup>-2</sup> | NONMMUT063543                                  | 2.86 | 3.2*10 <sup>-2</sup> |
| Ttll4    | 2.17 | 1.6*10 <sup>-3</sup> | NONMMUT001547                                  | 2.21 | 4.3*10 <sup>-2</sup> |
| Wdr91    | 2.26 | 9.0*10 <sup>-4</sup> | NONMMUT056333                                  | 3.51 | 1.7*10 <sup>-3</sup> |
| Whsc111  | 2.18 | 3.7*10 <sup>-3</sup> | NONMMUT064990<br>Gm45343                       | 2.66 | 2.6*10 <sup>-2</sup> |
| Zbtb16   | 8.19 | 3.0*10 <sup>-4</sup> | NONMMUT069015                                  | 3.33 | 2.1*10 <sup>-2</sup> |
| Cpne3    | 0.42 | 8.4*10 <sup>-3</sup> | NONMMUT046349                                  | 3.20 | 11.*10 <sup>-2</sup> |
| Gucyl1a2 | 0.40 | 1.5*10 <sup>-2</sup> | NONMMUT067888                                  | 2.67 | 3.1*10 <sup>-2</sup> |
| Manea    | 0.44 | 1.4*10 <sup>-2</sup> | NONMMUT046502                                  | 2.87 | 3.7*10 <sup>-2</sup> |
| Papss2   | 0.40 | 1.1*10 <sup>-2</sup> | NONMMUT034475                                  | 2.78 | 2.4*10 <sup>-2</sup> |
| Prex2    | 0.29 | 2.3*10 <sup>-2</sup> | NONMMUT000151                                  | 2.89 | 2.4*10 <sup>-2</sup> |
| Prlr     | 0.50 | 1.6*10 <sup>-2</sup> | NONMMUT022731                                  | 2.09 | 1.3*10 <sup>-2</sup> |
| Slc16a12 | 0.45 | 3.4*10 <sup>-3</sup> | NONMMUT034530                                  | 2.62 | 4.0*10 <sup>-2</sup> |
| Thsd7a   | 0.20 | 1.2*10 <sup>-3</sup> | NONMMUT055768                                  | 2.01 | 2.5*10 <sup>-2</sup> |
| C1qtnf7  | 0.45 | 3.4*10 <sup>-3</sup> | NONMMUT052109                                  | 0.43 | 4.4*10 <sup>-2</sup> |
| Magi2    | 0.37 | 8.9*10 <sup>-3</sup> | NONMMUT051353                                  | 0.28 | 4.0*10 <sup>-2</sup> |
| Npr3     | 0.16 | 3.8*10 <sup>-3</sup> | NONMMUT022770                                  | 0.49 | 2.9*10 <sup>-2</sup> |
| Robo2    | 0.20 | 1.6*10 <sup>-3</sup> | NONMMUT027254                                  | 0.43 | 4.4*10 <sup>-2</sup> |

Supplementary Table 2: Column 1 displays the age of mice; column 2 shows differentially expressed protein-coding genes with their x-fold change of expression (BTBR ob/ob vs. WT; column 3), the corresponding FDR p-value (column 4), and the overlapping lncRNA in sense direction (column 5). Column 6 and 7 inform about the lncRNA's x-fold change of expression (BTBR ob/ob vs. WT) and the corresponding FDR p-value. A blue background indicates a downregulation, a yellow background an upregulation.

**Supplementary Table 3: Differentially expressed genes and their corresponding antisense transcripts**

| Age      | Gene      | Fold change          | FDR p value          | Antisense transcript (more than one annotation possible)    | Fold change          | FDR p value          |
|----------|-----------|----------------------|----------------------|-------------------------------------------------------------|----------------------|----------------------|
| 8 weeks  | Lpl       | 0.26                 | 4.0*10 <sup>-4</sup> | NONMMUT065898                                               | 0.28                 | 1.0*10 <sup>-3</sup> |
|          | Lpl       | 0.26                 | 4.0*10 <sup>-4</sup> | LOC100861638                                                | 0.35                 | 7.9*10 <sup>-3</sup> |
|          | Tmem72    | 0.26                 | 2.9*10 <sup>-2</sup> | NONMMUT058536                                               | 0.48                 | 4.2*10 <sup>-2</sup> |
| 16 weeks | Ndrgl     | 2.81                 | 4.2*10 <sup>-3</sup> | NONMMUT023810<br>ENSMUST00000170557<br>Gm17035              | 3.86                 | 9.6*10 <sup>-3</sup> |
|          | Lpl       | 0.22                 | 9.0*10 <sup>-5</sup> | LOC100861638                                                | 0.24                 | 1.3*10 <sup>-3</sup> |
|          | Lpl       | 0.22                 | 9.0*10 <sup>-5</sup> | NONMMUT065898                                               | 0.31                 | 1.3*10 <sup>-3</sup> |
| 24 weeks | Arrdc3    | 3.66                 | 9.1*10 <sup>-5</sup> | NONMMUT006433<br>ENSMUST00000105760<br>Gm17151              | 2.54                 | 3.5*10 <sup>-2</sup> |
|          | Dot1l     | 2.45                 | 6.6*10 <sup>-3</sup> | NONMMUT018449<br>ENSMUST00000161006<br>1700023H06Rik        | 2.18                 | 6.0*10 <sup>-4</sup> |
|          | Olfir1055 | 2.13                 | 2.2*10 <sup>-2</sup> | NONMMUT038330                                               | 4.00                 | 1.5*10 <sup>-2</sup> |
|          | Abcg2     | 0.49                 | 2.0*10 <sup>-2</sup> | NONMMUT057170                                               | 2.05                 | 29*10 <sup>-2</sup>  |
|          | Acot3     | 0.41                 | 7.3*10 <sup>-3</sup> | NONMMUT014996                                               | 2.82                 | 1.3*10 <sup>-3</sup> |
|          | Acsml     | 0.25                 | 1.0*10 <sup>-4</sup> | NONMMUT063428<br>uc009jll.1<br>uc009jlk.1                   | 2.36                 | 4.4*10 <sup>-2</sup> |
|          | Acsml     | 0.25                 | 1.0*10 <sup>-4</sup> | NONMMUT063430<br>ENSMUST00000207795<br>Gm45792              | 13.54                | 2.6*10 <sup>-3</sup> |
|          | Cd302     | 0.44                 | 4.0*10 <sup>-4</sup> | NONMMUT037482                                               | 2.35                 | 1.4*10 <sup>-2</sup> |
|          | Fli1      | 0.38                 | 7.9*10 <sup>-3</sup> | LOC100862152<br>XR_140930.1                                 | 3.32                 | 1.6*10 <sup>-2</sup> |
|          | Tshz2     | 0.45                 | 1.7*10 <sup>-3</sup> | NONMMUT041414                                               | 2.33                 | 2.3*10 <sup>-2</sup> |
|          | Lpl       | 0.19                 | 5.7*10 <sup>-6</sup> | LOC100861638                                                | 0.13                 | 5.7*10 <sup>-6</sup> |
|          | Lpl       | 0.19                 | 5.7*10 <sup>-6</sup> | NONMMUT065898                                               | 0.16                 | 3.8*10 <sup>-6</sup> |
|          | Nphs1     | 0.25                 | 1.1*10 <sup>-2</sup> | NONMMUT060585<br>ENSMUST00000152625<br>NR_004443<br>Nphs1os | 0.37                 | 9.3*10 <sup>-3</sup> |
| Sept11   | 0.38      | 6.8*10 <sup>-3</sup> | NONMMUT053138        | 0.29                                                        | 4.2*10 <sup>-3</sup> |                      |

Supplementary Table 3: Column 1 displays the age of mice; column 2 shows differentially expressed protein-coding genes with their x-fold change of expression (BTBR ob/ob vs. WT; column 3), the corresponding FDR p-value (column 4), and the overlapping lncRNA in antisense direction (column 5). Column 6 and 7 inform about the lncRNA's x-fold change of expression (BTBR ob/ob vs. WT) and the corresponding FDR p-value. A blue background indicates a downregulation, a yellow background an upregulation.

**Supplementary Table 4: Differentially expressed genes and their corresponding neighboring transcripts**

| Age (weeks) | Distance (bp) | Gene    | Fold change | FDR p value          | Strand | Neighboring transcript (more than one annotation possible) | Fold change | FDR p value          | Strand | Up-/down-stream |
|-------------|---------------|---------|-------------|----------------------|--------|------------------------------------------------------------|-------------|----------------------|--------|-----------------|
| 24          | 147           | Fads2   | 0.38        | 4.0*10 <sup>-4</sup> | -      | NONMMUT033869; uc008gpa.1; AK192544                        | 0.36        | 4.3*10 <sup>-3</sup> | -      | down            |
| 24          | 366           | Pon3    | 0.31        | 4.0*10 <sup>-4</sup> | -      | NONMMUT055603; NovelTID_00004948                           | 0.29        | 3.0*10 <sup>-4</sup> | -      | down            |
| 24          | 814           | Cyp2j9  | 2.32        | 1.6*10 <sup>-2</sup> | -      | NONMMUT048206                                              | 2.34        | 1.9*10 <sup>-2</sup> | -      | down            |
| 24          | 1397          | Casr    | 0.17        | 1.5*10 <sup>-3</sup> | -      | NONMMUT026469                                              | 0.16        | 3.0*10 <sup>-4</sup> | -      | down            |
| 24          | 1978          | Nrg1    | 2.09        | 8.0*10 <sup>-4</sup> | -      | NONMMUT065119                                              | 2.62        | 5.0*10 <sup>-3</sup> | -      | up              |
| 24          | 2236          | Baat    | 0.47        | 6.4*10 <sup>-3</sup> | -      | NONMMUT047233                                              | 0.40        | 2.1*10 <sup>-3</sup> | +      | down            |
| 24          | 2462          | Frmd4b  | 3.62        | 3.0*10 <sup>-5</sup> | -      | NONMMUT058132; KnowTID_00006398                            | 2.49        | 3.8*10 <sup>-3</sup> | -      | down            |
| 24          | 2951          | Pde3a   | 0.39        | 4.2*10 <sup>-3</sup> | +      | NONMMUT059325; KnowTID_00006219                            | 0.39        | 8.1*10 <sup>-3</sup> | +      | down            |
| 8           | 3687          | Slc16a7 | 0.33        | 2.1*10 <sup>-2</sup> | -      | NONMMUT008003; KnowTID_00001096                            | 0.29        | 4.8*10 <sup>-2</sup> | -      | down            |
| 24          | 3961          | Fads3   | 0.44        | 1.0*10 <sup>-3</sup> | +      | NONMMUT033869; uc008gpa.1; AK192544                        | 0.36        | 4.3*10 <sup>-3</sup> | -      | down            |
| 24          | 4142          | Top1mt  | 0.45        | 3.1*10 <sup>-2</sup> | -      | NONMMUT023966                                              | 0.21        | 8.3*10 <sup>-3</sup> | -      | down            |
| 24          | 4637          | Itpr1   | 2.56        | 1.0*10 <sup>-4</sup> | +      | NONMMUT058324; KnowTID_00006165                            | 2.07        | 2.0*10 <sup>-4</sup> | +      | down            |
| 24          | 4918          | Aadac   | 0.37        | 4.6*10 <sup>-3</sup> | +      | NONMMUT043269                                              | 4.7         | 9.3*10 <sup>-3</sup> | +      | down            |
| 24          | 5629          | Acot1   | 2.47        | 2.8*10 <sup>-2</sup> | +      | NONMMUT014993; KnowTID_00001645                            | 2.03        | 1.4*10 <sup>-2</sup> | -      | down            |
| 24          | 5702          | Slc16a7 | 0.33        | 2.1*10 <sup>-2</sup> | -      | NONMMUT008002; KnowTID_00001095                            | 0.32        | 9.1*10 <sup>-3</sup> | -      | down            |
| 24          | 6666          | Pde3a   | 0.39        | 4.2*10 <sup>-3</sup> | +      | NONMMUT059326; KnowTID_00006220                            | 0.48        | 2.0*10 <sup>-2</sup> | +      | down            |
| 24          | 8587          | Cyp2d12 | 0.45        | 9.1*10 <sup>-3</sup> | +      | NONMMUT024377                                              | 2.92        | 2.4*10 <sup>-2</sup> | -      | up              |
| 24          | 9250          | Cox6a2  | 2.12        | 3.7*10 <sup>-2</sup> | -      | NONMMUT063796; KnowTID_00006927                            | 2.38        | 3.2*10 <sup>-2</sup> | -      | up              |
| 24          | 11433         | Ak4     | 0.39        | 2.7*10 <sup>-2</sup> | +      | NONMMUT048353; ENSMUST00000124786; Gm12798                 | 7.16        | 6.0*10 <sup>-4</sup> | +      | up              |
| 24          | 14700         | Ak4     | 0.39        | 2.7*10 <sup>-2</sup> | +      | NONMMUT048348; ENSMUST00000142581; NR_040640               | 5.48        | 1.0*10 <sup>-4</sup> | +      | up              |
| 24          | 15943         | Nt5c3b  | 0.46        | 5.2*10 <sup>-7</sup> | -      | NONMMUT012011                                              | 0.49        | 8.2*10 <sup>-3</sup> | -      | up              |

|    |       |          |      |                      |   |                                                  |      |                      |   |      |
|----|-------|----------|------|----------------------|---|--------------------------------------------------|------|----------------------|---|------|
| 24 | 24458 | Acot3    | 0.41 | $7.3 \times 10^{-3}$ | + | NONMMUT014993; KnowTID_00001645                  | 2.03 | $1.4 \times 10^{-2}$ | - | up   |
| 24 | 24527 | Gstp1    | 0.42 | $4.0 \times 10^{-4}$ | - | NONMMUT033453; KnowTID_00004163                  | 2.79 | $1.6 \times 10^{-2}$ | - | up   |
| 24 | 25119 | Prpf38b  | 2.06 | $6.8 \times 10^{-3}$ | - | NONMMUT044811; ENSMUST00000141723                | 4.16 | $3.7 \times 10^{-2}$ | - | up   |
| 24 | 25415 | Mrpl50   | 0.39 | $4.6 \times 10^{-3}$ | - | NONMMUT047233                                    | 0.40 | $2.1 \times 10^{-3}$ | + | down |
| 24 | 25441 | Magi2    | 0.37 | $8.9 \times 10^{-3}$ | + | NONMMUT051340; KnowTID_00005787                  | 0.48 | $2.8 \times 10^{-2}$ | - | up   |
| 24 | 25868 | Clec14a  | 0.35 | $8.8 \times 10^{-3}$ | - | NONMMUT014344                                    | 2.87 | $3.5 \times 10^{-2}$ | + | up   |
| 24 | 26733 | Tram1    | 0.41 | $6.0 \times 10^{-4}$ | - | NONMMUT000191; KnowTID_00000399                  | 2.02 | $4.6 \times 10^{-2}$ | - | up   |
| 24 | 28759 | Wt1      | 0.28 | $5.1 \times 10^{-3}$ | + | NONMMUT038946; KnowTID_00004536                  | 0.47 | $4.5 \times 10^{-2}$ | - | up   |
| 8  | 30090 | Slc16a7  | 0.33 | $2.1 \times 10^{-2}$ | - | NONMMUT008011; KnowTID_00001098                  | 0.47 | $3.2 \times 10^{-2}$ | - | up   |
| 24 | 31485 | Id2      | 0.48 | $1.0 \times 10^{-2}$ | - | NONMMUT013709                                    | 2.72 | $2.4 \times 10^{-2}$ | + | down |
| 24 | 34643 | Sh3bgrl2 | 0.41 | $1.2 \times 10^{-2}$ | + | NONMMUT070284; KnowTID_00007546                  | 2.95 | $2.5 \times 10^{-2}$ | + | up   |
| 24 | 35143 | Alas2    | 2.38 | $1.0 \times 10^{-2}$ | + | NONMMUT074311; KnowTID_00008070                  | 2.48 | $1.3 \times 10^{-2}$ | - | up   |
| 24 | 42355 | Lpin1    | 3.05 | $1. \times 10^{-3}$  | - | NONMMUT013502; NovelTID_00001395                 | 2.57 | $1.7 \times 10^{-2}$ | + | up   |
| 24 | 43736 | Plekha7  | 2.23 | $1.6 \times 10^{-3}$ | - | NONMMUT063351; Gm44867                           | 2.53 | $5.6 \times 10^{-3}$ | - | up   |
| 24 | 46393 | Cpeb4    | 2.07 | $2.0 \times 10^{-3}$ | + | NONMMUT009155; ENSMUST00000126265; D630024D03Rik | 2.38 | $1.2 \times 10^{-3}$ | - | up   |
| 24 | 47668 | St3gal6  | 0.46 | $2.9 \times 10^{-3}$ | - | NONMMUT027043; KnowTID_00003159                  | 2.58 | $3.1 \times 10^{-2}$ | + | up   |
| 24 | 48617 | Rps13    | 0.48 | $2.0 \times 10^{-4}$ | - | NONMMUT063351; Gm44867                           | 2.53 | $5.6 \times 10^{-3}$ | - | down |
| 24 | 49917 | Tmem150c | 0.34 | $2.1 \times 10^{-3}$ | - | NONMMUT053283                                    | 2.25 | $8.2 \times 10^{-3}$ | + | down |

Supplementary Table 4: Column 1 displays the age of mice; column 2 provides information about the shortest distance between a differentially expressed protein-coding gene (column 3) and its neighboring differentially expressed lncRNA (column 7). Column 4 and 8 show the respective x-fold change of expression (BTBR ob/ob vs. WT), column 5 and 9 the FDR p-value, and column 6 and 10 the DNA strand, where the corresponding is gene encoded. Column 11 displays the position of the lncRNA relatively to the neighboring protein-coding gene, with up for an upstream position and down for a downstream position. A blue background indicates a downregulation, a yellow background an upregulation.



**Supplementary Table 5: Primer sequences of analyzed coding and non-coding genes**

| Gene          | forward                     | reverse                     |
|---------------|-----------------------------|-----------------------------|
| Acsml         | 5'-CTTGATTCTGCCCCGAGTG-3'   | 5'-GTCCTTGGCTTTCAGTTGGG-3'  |
| Casr          | 5'-AGGGCATCATTGAGGGAGAG-3'  | 5'-CTCGCATCTGTCTCACCCT-3'   |
| Cyclophilin B | 5'-TGATCCAGGGTGGAGACTTC-3'  | 5'-ATTGGTGTCTTTGCCTGCAT-3'  |
| Gm4579        | 5'-GGCTCCAAAGTCACAACAGG-3'  | 5'-TGTGTCCAAGGTCTGCTCAC-3'  |
| Itpr1         | 5'-GCTCAATCCCACCAATGCTG-3'  | 5'-AGCCACACCTCTTCCTCATC-3'  |
| NONMMUT026469 | 5'-ACAGCCAGGACTACACAAGG-3'  | 5'-GCCCTCTGATTTCCATGCAG-3'  |
| NONMMUT038946 | 5'-CACCGTACTCAAGCAAACCC-3'  | 5'-CAAAAGAGGGTCACAGCCCAC-3' |
| NONMMUT050705 | 5'-TCTCCCAAGTGCCAGTGTAG-3'  | 5'-TACAAGTTCCTTCCGAGCC-3'   |
| NONMMUT050715 | 5'-TTTGCTGTGCTTACCAGGGA-3'  | 5'-TCGTGAGTTTGTGTGTTGCA-3'  |
| NONMMUT058318 | 5'-GTCTGTGTGGCAATCCCTAC-3'  | 5'-GGCATCTGGTCACGTTCTTC-3'  |
| NONMMUT058319 | 5'-TAGTTGTCACGGAGGGAAGG-3'  | 5'-TTGAATGAGAAGGAGCCGAG-3'  |
| NONMMUT058320 | 5'-TCATGAGTGGAAGGAACAGC-3'  | 5'-GGGGCTAGAGGAAACAAGTT-3'  |
| Nphs1         | 5'-TGGATATAGTCTGCACCGTCG-3' | 5'-ATCTTCTCCATGTCGTCCAGG-3' |
| Nphs1as       | 5'-ACATGAAACTTTCCCATCCCC-3' | 5'-GCAGTTTGACATCCCTTGAGG-3' |
| Rere          | 5'-TGACACCACTCTCAATGCAC-3'  | 5'-GCACTTCTCGATCAGCTTGG-3'  |
| Uc009jll.1    | 5'-GCCTATGGATGTGGGTGTTTC-3' | 5'-GGCAGAAACAGGCAAGTACC-3'  |
| Wt1           | 5'-CCAAATGACCTCCCAGCTTG-3'  | 5'-TGCCCTTCTGTCCATTTACAC-3' |

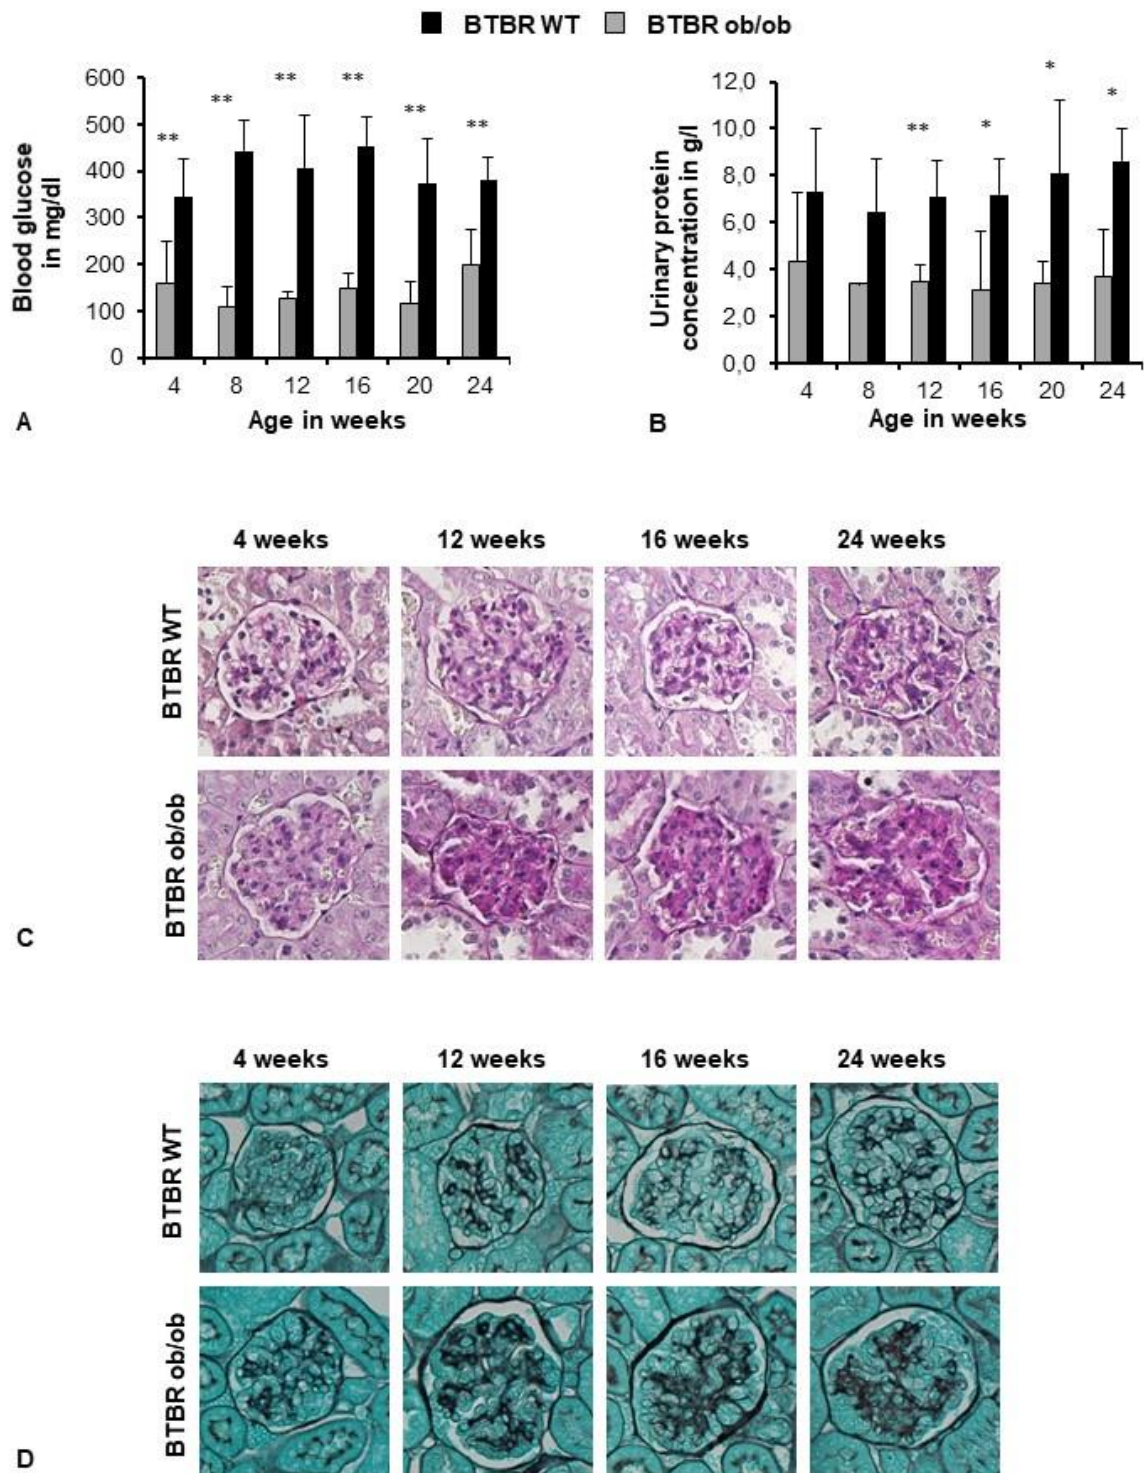

Supplementary Figure 1: Characterization of BTBR WT and BTBR ob/ob mice in the course of time. (A) Blood glucose concentration in mg/dl and (B) urinary protein concentration in g/l in four, eight, twelve, 16, 20 and 24 weeks old BTBR WT and ob/ob mice. Black bars (+SD) represent WT mice, grey bars (+SD) diabetic mice. Statistical analysis was conducted using one-way ANOVA with \*)  $p < 0.05$ ; \*\*)  $p < 0.01$ ;  $n=6-8$ . (C) Periodic acid-Schiff stain and (D) silver stain of renal paraffin-embedded sections from four, twelve, 16, 24 weeks old BTBR WT and ob/ob mice. Staining was performed according to standard protocols. Images were taken using a Axiostar plus microscope and AxioVision Release 4.8.1 software (both Zeiss, Jena, Germany). Magnification: 400-fold;  $n=6-8$

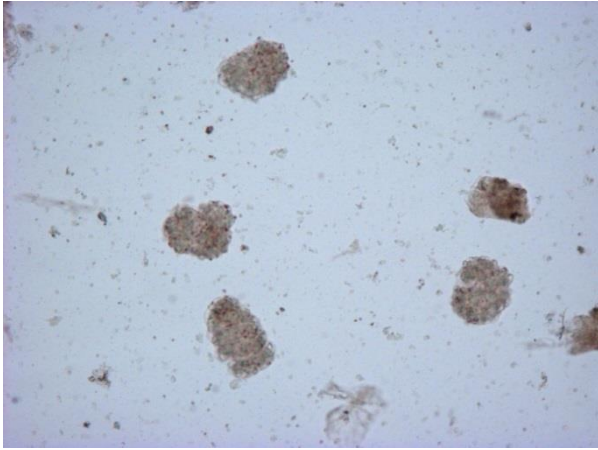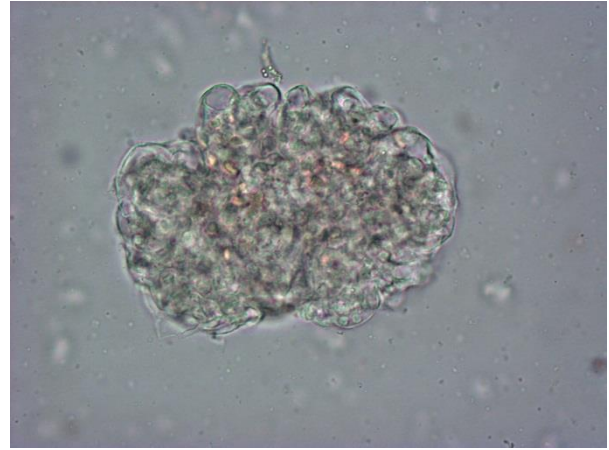

Supplementary Figure 2: A representative photograph from sieved glomeruli from BTBR mice showing the degree of purity. The glomeruli displayed here were collected from 760  $\mu\text{m}$  sieves. Images were taken using a AxioStar plus microscope and AxioVision Release 4.8.1 software (both Zeiss, Jena, Germany). Magnification of 100-fold (left) and 400-fold (right).

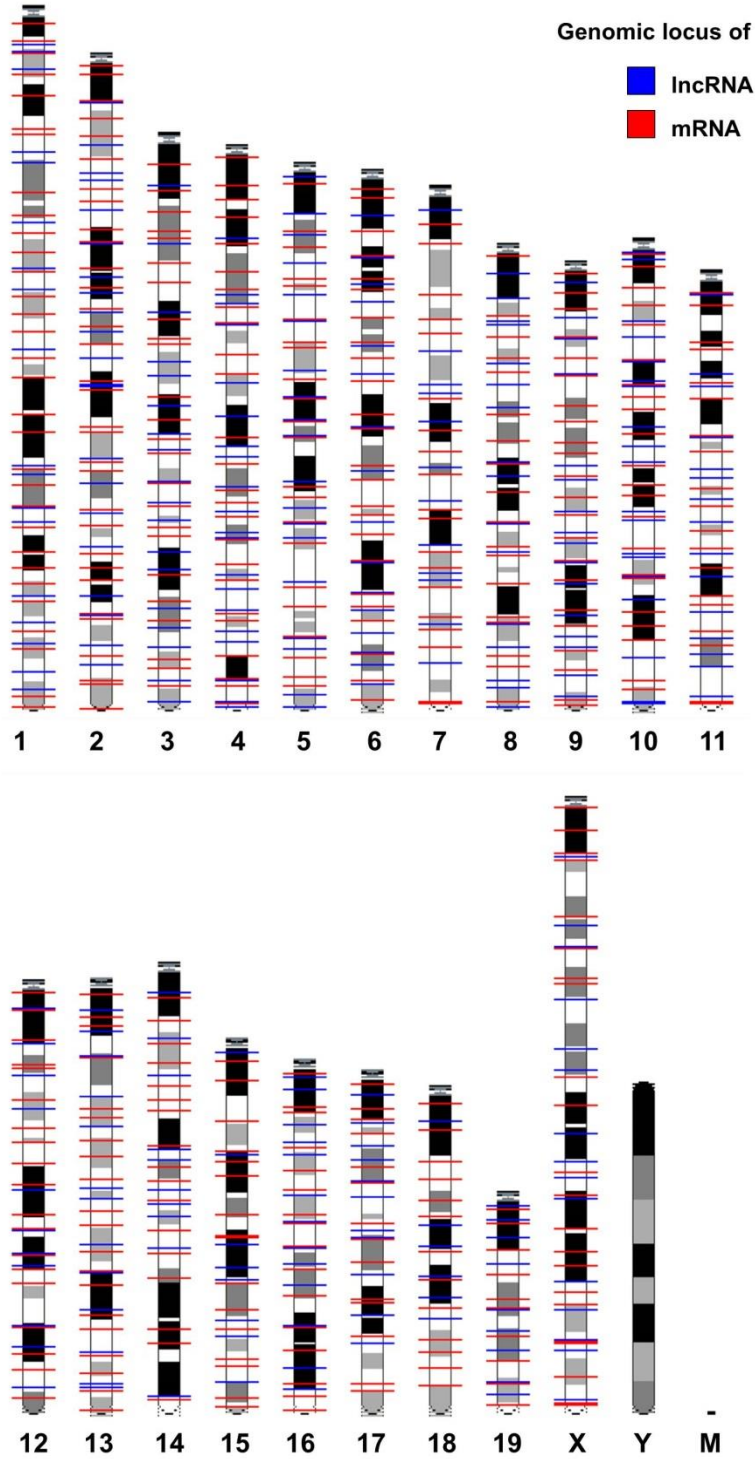

Supplementary Figure 3: Murine karyotype showing the genomic loci of all differentially expressed lncRNAs (blue) and mRNAs (red) encoded on chromosome 1-19, the heterochromosomes X and Y, and the mitochondrial chromosome (M). The karyotype was created using Ensembl Genome Database ([www.ensembl.org](http://www.ensembl.org)).

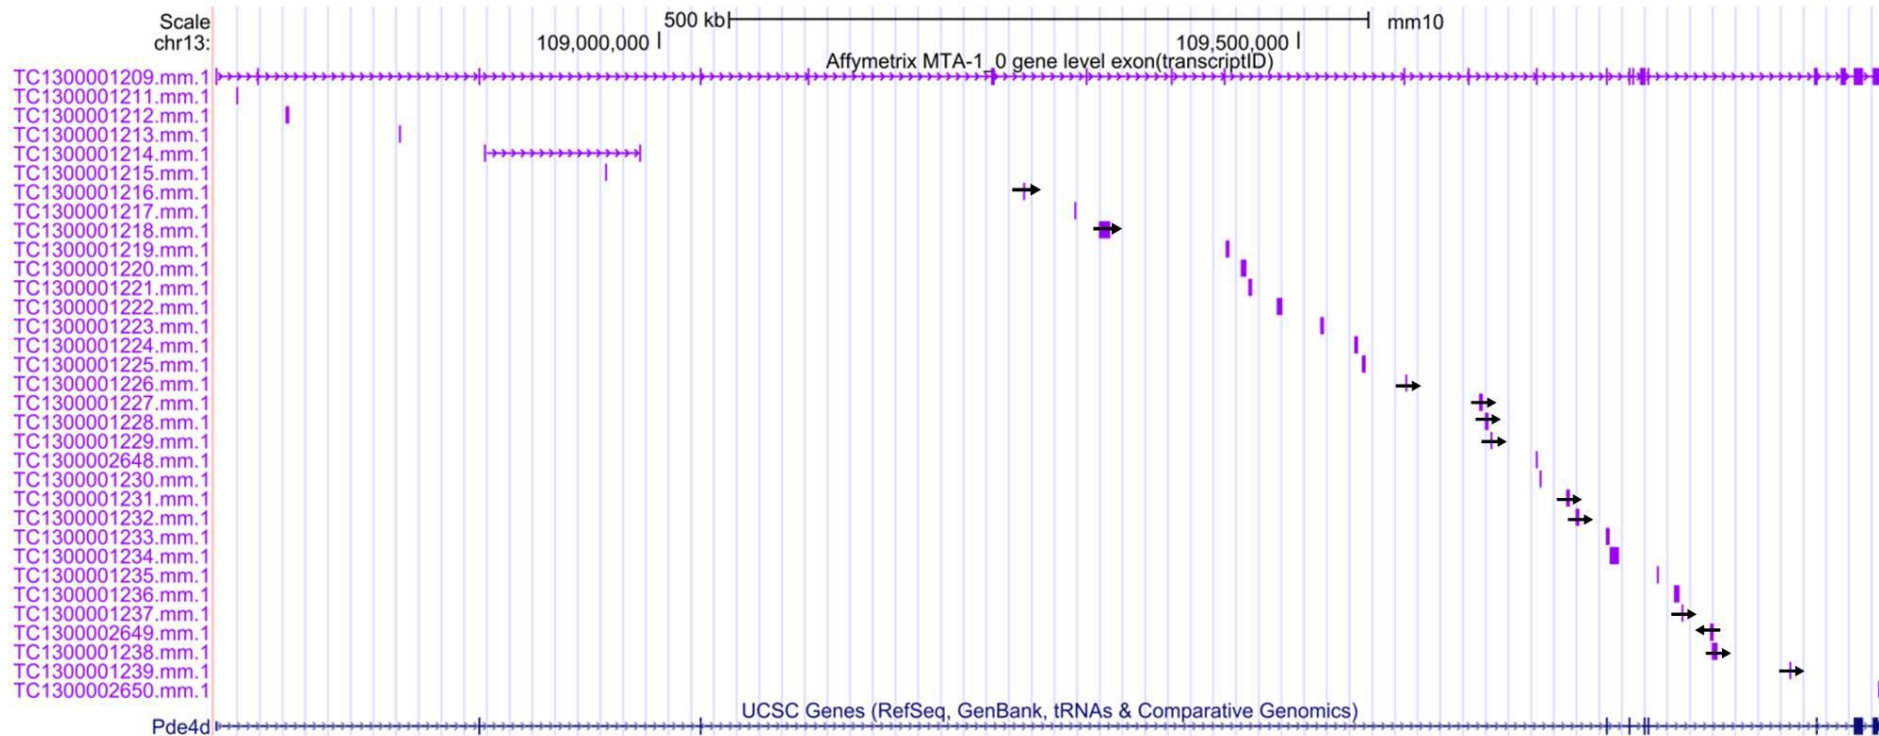

Supplementary Figure 4: Pde4d gene locus with all intragenic encoded lncRNA genes. Pde4d as depicted by the UCSC Genes track on the UCSC Genome Browser (Mouse Assembly mm10) is shown as UCSC gene (blue) and as probe set with the transcript cluster ID TC1000000215.mm (purple). Pde4d is encoded on the + DNA strand. All intragenic lncRNA genes and their transcript cluster IDs which are covered by the array are displayed after loading the Affymetrix MTA-1\_0\_gene level exon (transcriptID) Track Settings. Additionally, differentially expressed intronic lncRNAs are labeled with an arrow. The direction of the arrow indicates a sense ( $\rightarrow$ ) or an antisense ( $\leftarrow$ ) orientation.
